# Supplementary material for: Direct analysis in real-time high-resolution mass spectrometry as a valuable tool for polyphenols profiling in olive oil
Source: Royal Society of Chemistry journal article supplement (doi:10.1039/c8ay01865k), 2018-12-10

## SUPPLEMENTARY CONTENT

---

### **Direct Analysis in Real Time - High resolution mass spectrometry as a valuable tool for polyphenols profiling in olive oil**

M. Farre<sup>1</sup>, Y. Picó<sup>2</sup>, D. Barceló<sup>1,3</sup>

<sup>1</sup>Water and Soil Quality Research Group, Institute of Environmental Assessment and Water Research (IDAEA-CSIC), C/Jordi Girona, 18-26, 08911 Barcelona, Catalonia, Spain

<sup>2</sup>Food and Environmental Safety Research Group (SAMA-UV), Centre of Research on Desertification (CIDE), (Joint Center CSIC-University of Valencia-GV), Moncada-Náquera Road, Km 4,5, 46113 Moncada, València, Spain.

<sup>3</sup>Catalan Institute of Water Research (ICRA), C/ Emili Grahit, 101, 17003 Girona, Catalonia, Spain

**Table S1** Characteristics of the oil samples analyzed in the present study

| Number | Type      | Quality <sup>1</sup> | Origin                            | Variety                             | Data of consumption |
|--------|-----------|----------------------|-----------------------------------|-------------------------------------|---------------------|
| 1      | Olive     | EVOO                 | Spain                             | Not specified                       | August, 2015        |
| 2      | Olive     | EVOO                 | Cacerés,<br>Extremadura (Spain)   | Cacereña                            | March, 2015         |
| 3      | Olive     | EVOO                 | Andalusia (Spain)                 | Picual                              | August, 2015        |
| 4      | Olive     | EVOO                 | Andalusia (Spain)                 | Hojiblanca                          | September, 2015     |
| 5      | Olive     | VOO                  | Spain                             | Not specified                       | June, 2015          |
| 6      | Sunflower | -----                | -----                             | -----                               | -----               |
| 7      | Sunflower | ---                  | -----                             | -----                               | -----               |
| 8      | Olive     | EVOO                 | Spain                             | Not specified                       | July, 2015          |
| 9      | Olive     | OO                   | Spain                             | Not specified                       | Not specified       |
| 10     | Maize     | ---                  | -----                             | -----                               | -----               |
| 11     | Olive     | OO                   | Spain                             | Arbequina                           | Not specified       |
| 12     | Olive     | EVOO                 | Lleida, Catalonia<br>(Spain)      | Arbequina,<br>Verdells,<br>Grossals | October, 2015       |
| 13     | Olive     | EVOO                 | Granada, Andalusia<br>(Spain)     | Not specified                       | March, 2015         |
| 14     | Olive     | EVOO                 | Emporda, Catalonia<br>(Spain)     | Agudell                             | June, 2015          |
| 15     | Olive     | EVOO                 | Andalusia (Spain)                 | Picual                              | July, 2015          |
| 16     | Olive     | EVOO                 | Lleida, Catalonia<br>(Spain)      | Arbequina,<br>Picual                | June, 2016          |
| 17     | Olive     | EVOO                 | Catalonia (Spain)                 | Arbequina,<br>Picual                | April, 2016         |
| 18     | Olive     | EVOO                 | Catalonia (Spain)                 | Arbequine,<br>Argudell              | November, 2014      |
| 19     | Olive     | EVOO                 | Alt Emporda,<br>Catalonia (Spain) | Argudell                            | November, 2015      |
| 20     | Olive     | EVOO                 | Andalusia (Spain)                 | Picual                              | November, 2015      |
| 21     | Olive     | EVOO                 | Spain                             | Arbequine                           | July, 2015          |
| 22     | Olive     | EVOO                 | Catalonia (Spain)                 | Arbequine                           | Not specified       |
| 23     | Olive     | EVOO                 | Spain                             | Hojiblanca                          | January, 2016       |
| 24     | Olive     | EVOO                 | Andalusia (Spain)                 | Picual                              | July, 2016          |
| 25     | Olive     | EVOO                 | Andalusia (Spain)                 | Picual                              | July, 2015          |
| 26     | Olive     | EVOO                 | Andalusia (Spain)                 | Picual                              | July, 2015          |
| 27     | Olive     | EVOO                 | Spain                             | Picual                              | July, 2015          |
| 28     | Olive     | EVOO                 | Spain                             | Picual                              | November, 2015      |
| 29     | Olive     | EVOO                 | Spain                             | Not specified                       | December, 2015      |
| 30     | Olive     | EVOO                 | Segria, Catalonia<br>(Spain)      | Arbequine                           | Not defined         |
| 31     | Olive     | EVOO                 | Greece                            | Kalamata                            | Not defined         |
| 32     | Olive     | EVOO                 | Greece                            | Not specified                       | Not defined         |

<sup>1</sup> EVOO: extra virgin olive oil; VOO: virgin olive oil; OO: olive oil

**Fig. S1** Deprotonated molecule  $[M-H]^-$  intensity and its RSD against different DART conditions

A) Transmission-DART module

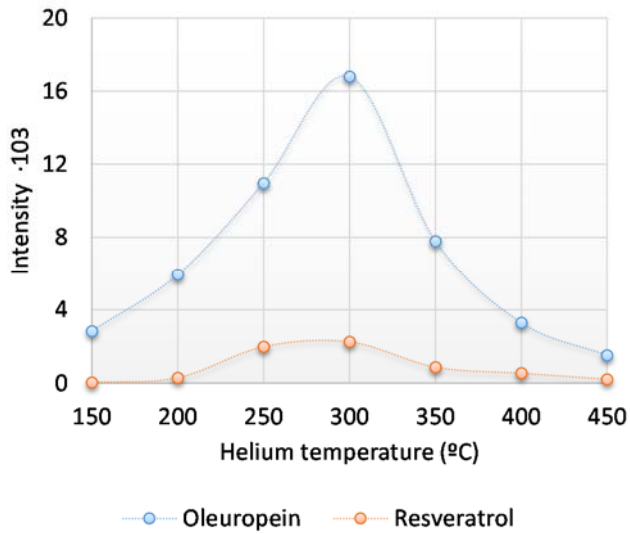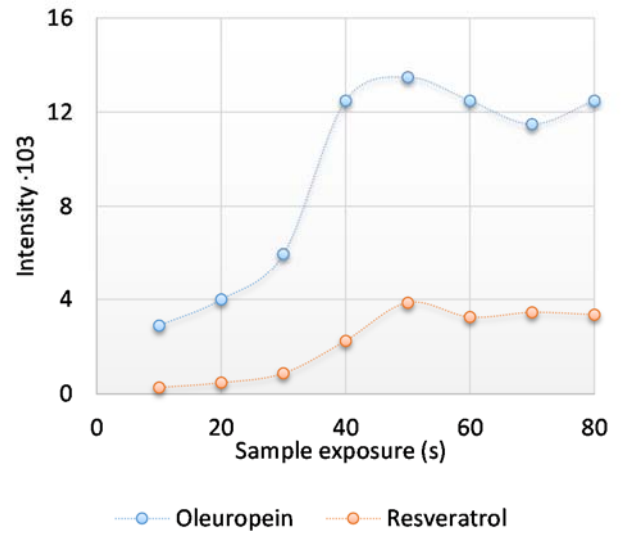

B) 12-Dip it

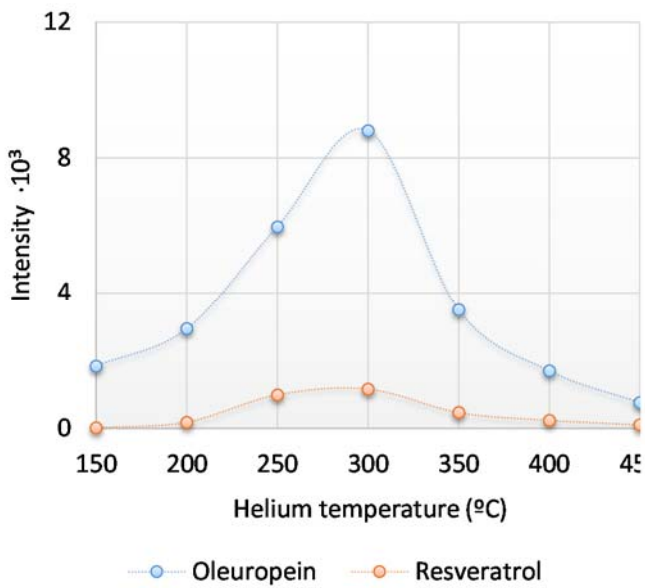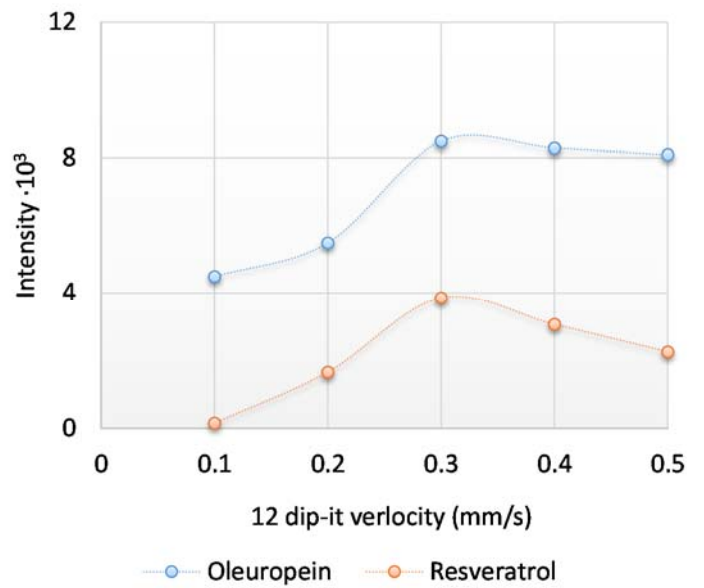

**Table S2.** Comparison of peak intensity and its RSDs ( $n=10$ ) for 12-Dip it and transmission modules using the optimized conditions

| Polyphenol                           | 12-Dip it module |      | Transmission module |      |
|--------------------------------------|------------------|------|---------------------|------|
|                                      | Peak area        | RSDs | Peak area           | RSDs |
| Resveratrol                          | 1028572          | 15   | 1456298             | 8    |
| Hydroxybenzoic acid                  | 1529872          | 20   | 2272510             | 11   |
| Vainillin                            | 1402958          | 25   | 2587836             | 15   |
| Hydroxytyrosol                       | 2019485          | 22   | 2726530             | 10   |
| Hydroxydecarboxymethyl elenolic acid | 3420558          | 20   | 6638832             | 9    |
| Elenolic acid                        | 10485772         | 18   | 20841020            | 8    |
| Oleuropein aglycone                  | 12038528         | 15   | 26650368            | 7    |
| Hydroxyelenolic acid                 | 2598672          | 12   | 5368191             | 8    |
| Ligstroside aglycone                 | 2462985          | 15   | 4910304             | 7    |

**Table S3.** Resveratrol recoveries using different conditions to extract the compounds from an EVOO spiked at mg g<sup>-1</sup>.

|                                    | Values of the conditions/recovery obtained |         |                  |                                   |                                  |
|------------------------------------|--------------------------------------------|---------|------------------|-----------------------------------|----------------------------------|
| Amount of sample (g)               | 0.5                                        | 1       | 1.5              | 2                                 |                                  |
| Recovery (%)                       | 98                                         | 97      | 82               | 60                                |                                  |
| Volume of hexane (mL)              | 0.5                                        | 1       | 1.5              |                                   |                                  |
| Recovery (%)                       | 97                                         | 96      | 92               |                                   |                                  |
| Extractant                         | MeOH                                       | AcN     | H <sub>2</sub> O | MeOH-H <sub>2</sub> O (50:50 v/v) | AcN-H <sub>2</sub> O (50:50 v/v) |
| Recovery (%)                       | 85                                         | 75      | 80               | 97                                | 87                               |
| % of MeOH-H <sub>2</sub> O mixture | (25: 75)                                   | (50:50) | (75:25)          | (90:10)                           |                                  |
| Recovery (%)                       | 86                                         | 90      | 96               | 89                                |                                  |
| Agitation time (min)               | 0.5                                        | 1       | 2                | 3                                 | 5                                |
| Recovery (%)                       | 83                                         | 86      | 93               | 98                                | 98                               |
| Centrifugation time (min)          | 2                                          | 3       | 4                | 5                                 |                                  |
| Recovery (%)                       | 96                                         | 97      | 97               | 97                                |                                  |

**Fig. S2** DART-Orbitrap-MS/MS identification of (A) Elenolic acid, (B) Hydroxydecarboxymethyl oleuropein aglycone and (C) Hydroxy oleuropein aglycone

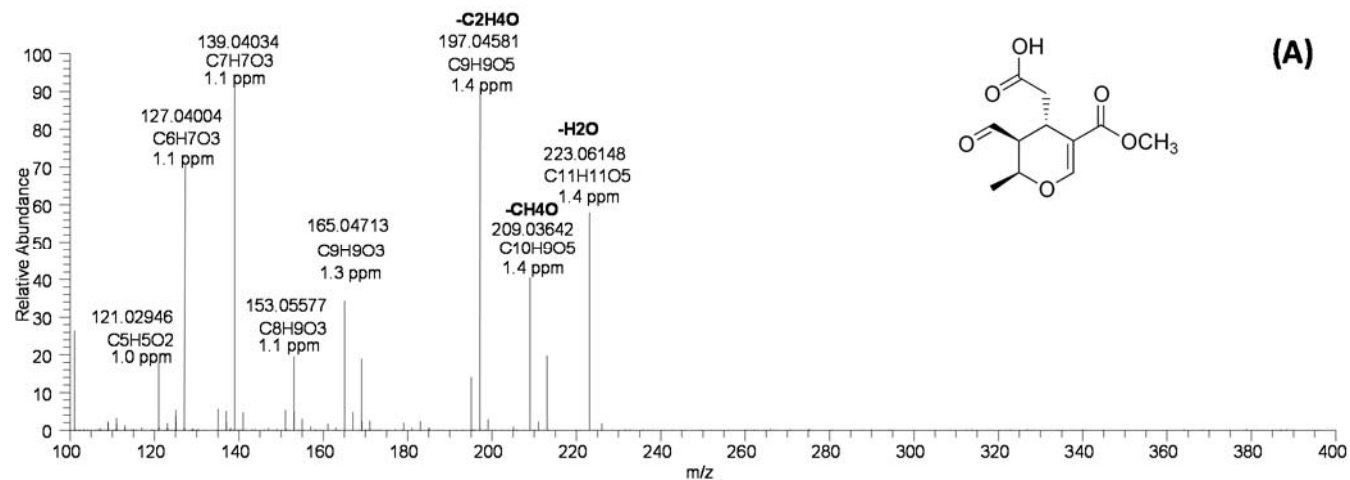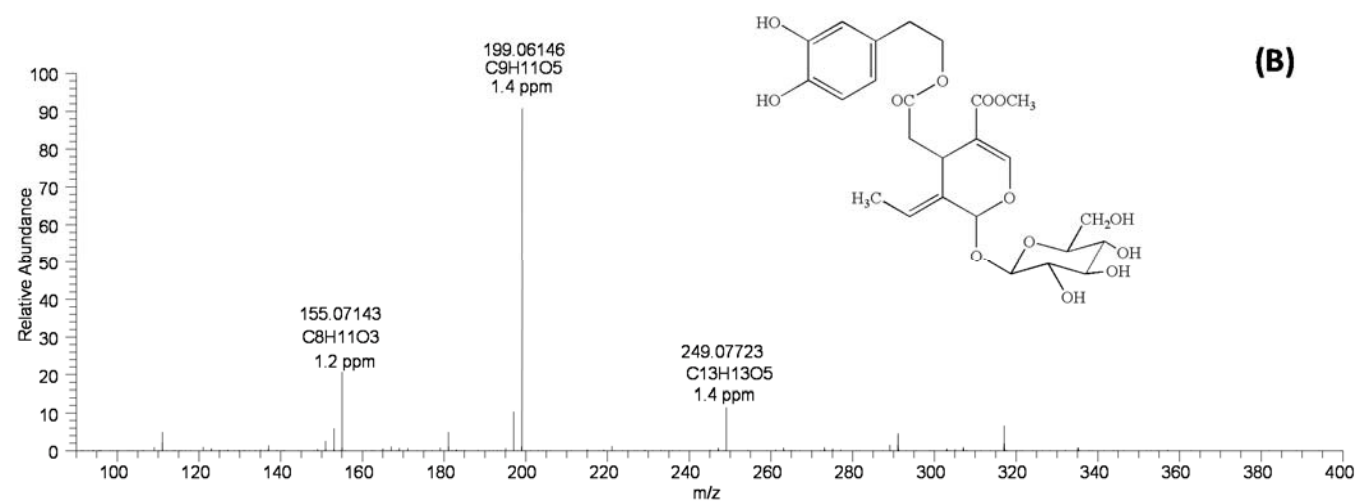

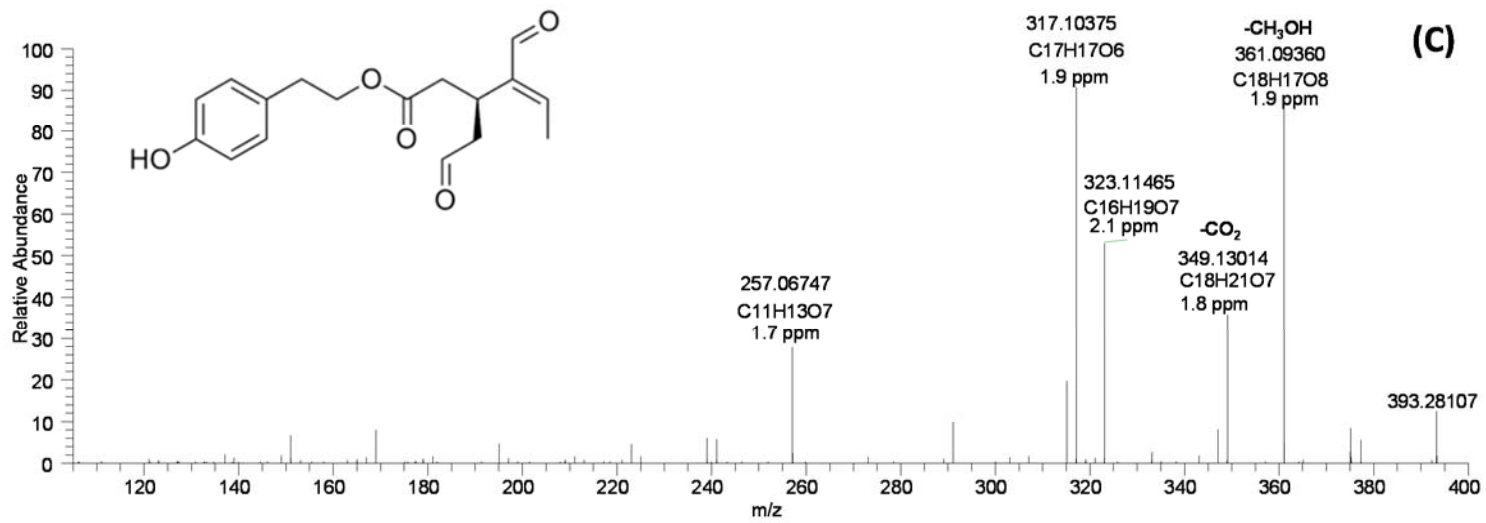

Fig. S3. DART-MS of EVOO 9

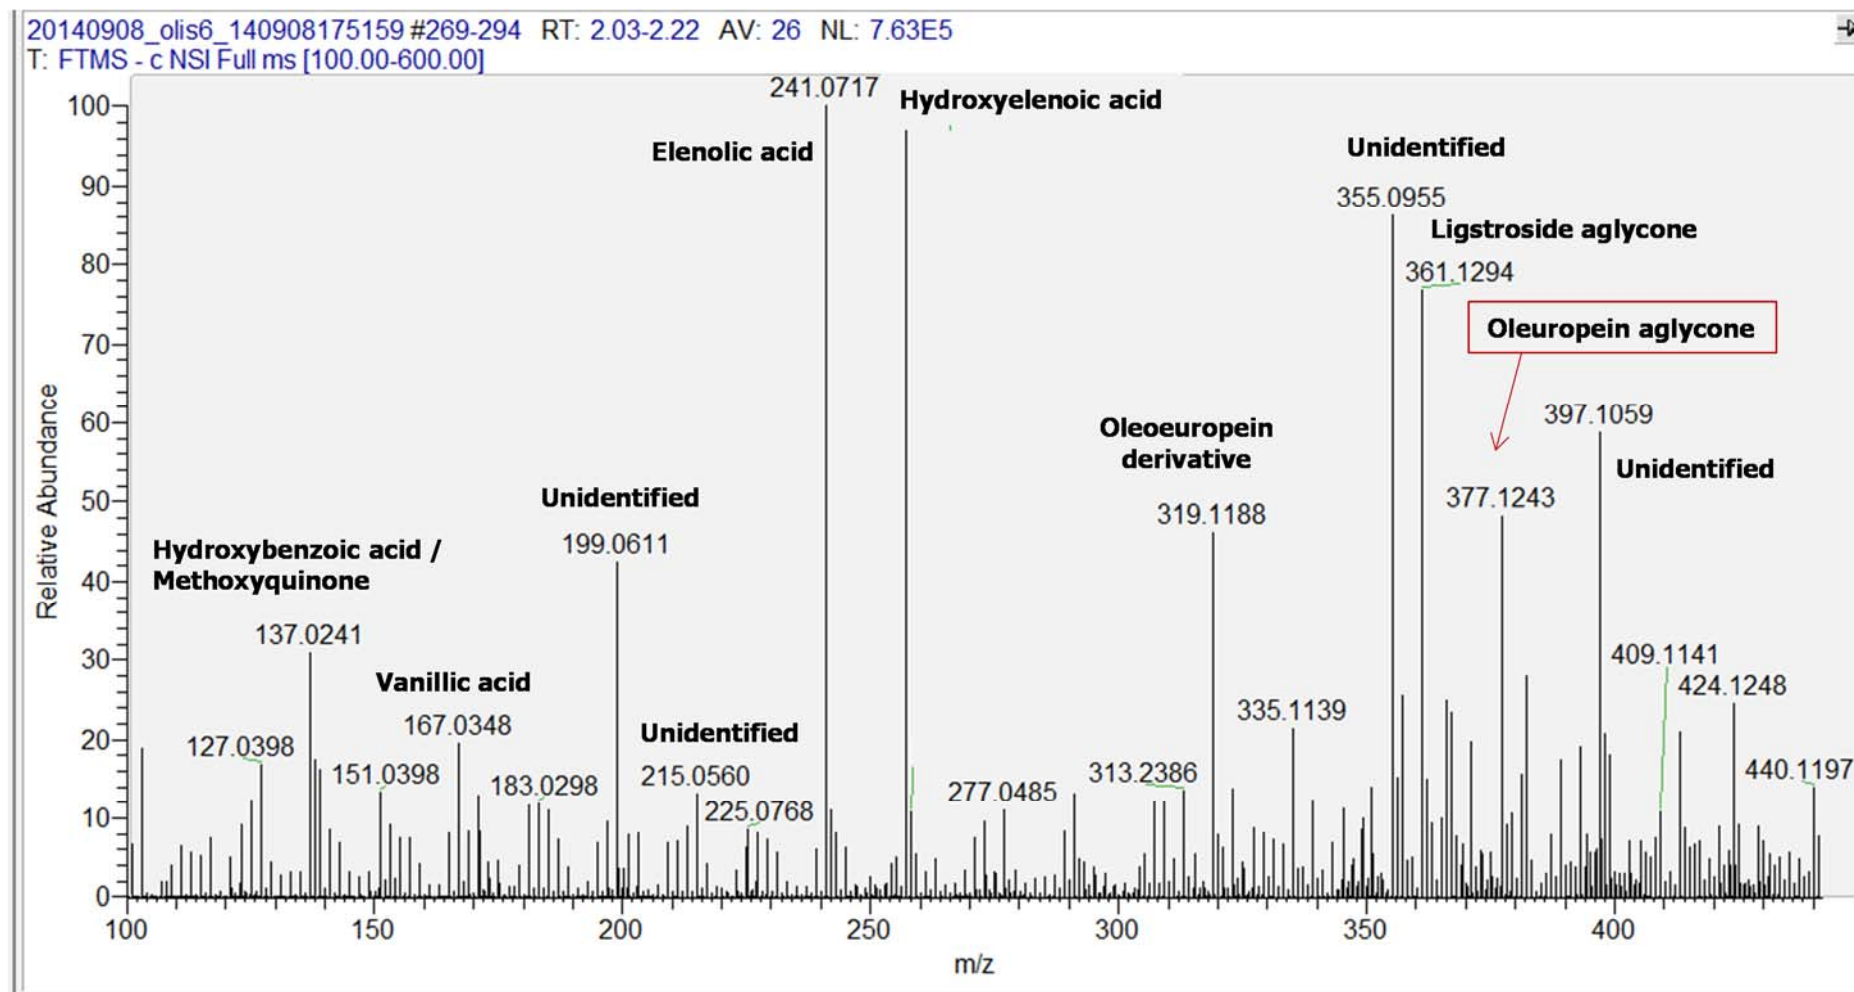



**Fig S4** Detailed results of the method validation for resveratrol

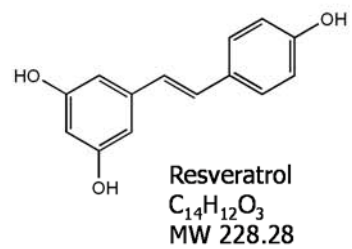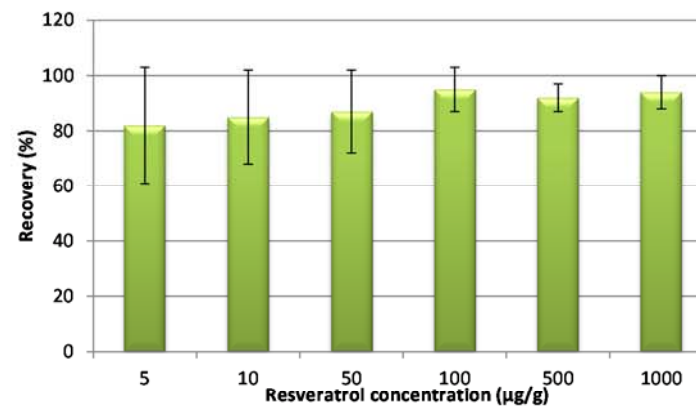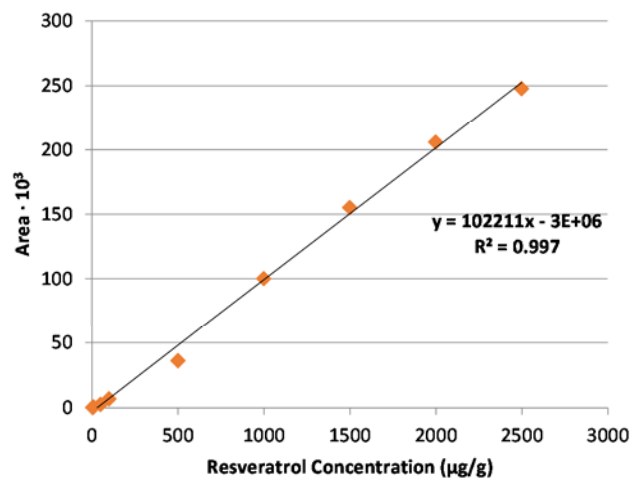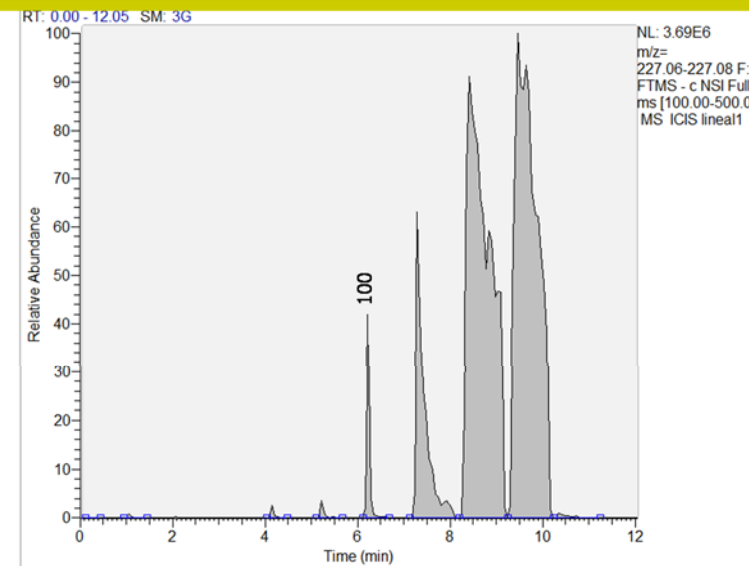

**Table S4.** Precision of the different main polyphenols ions intensity and masses (average values  $\pm$  RSDs) Various strategies have been adopted to remove arsenic from water sources, including oxidation/precipitation, coagulation, ion exchange, and membrane-based separation.

| Intra-day precision ( $n=10$ ) |         |               |          | Inter-day precision ( $n=10$ ) |         |               |          |
|--------------------------------|---------|---------------|----------|--------------------------------|---------|---------------|----------|
| Average (m/z)                  | RSD (%) | Ion Intensity | RSDs (%) | Average (m/z)                  | RSD (%) | Ion Intensity | RSDs (%) |
| 137.03153                      | 0.0010  | 573858        | 17       | 137.0315                       | 0.0011  | 95692         | 23       |
| 139.02752                      | 0.0009  | 565699        | 14       | 139.0274                       | 0.0011  | 94332         | 21       |
| 151.03659                      | 0.0006  | 447688        | 15       | 151.0368                       | 0.0008  | 74667         | 19       |
| 153.03927                      | 0.0017  | 525391        | 10       | 153.0383                       | 0.0018  | 87618         | 13       |
| 165.03882                      | 0.0024  | 529055        | 10       | 165.0395                       | 0.0016  | 88232         | 14       |
| 167.03586                      | 0.0015  | 457421        | 11       | 167.0371                       | 0.0013  | 76294         | 14       |
| 169.04088                      | 0.0040  | 367492        | 10       | 169.0402                       | 0.0051  | 61307         | 14       |
| 181.03710                      | 0.0015  | 446551        | 15       | 181.0358                       | 0.0004  | 74488         | 18       |
| 183.05495                      | 0.0018  | 563907        | 17       | 183.0543                       | 0.0020  | 94048         | 24       |
| 185.05490                      | 0.0073  | 372536        | 18       | 185.0485                       | 0.0065  | 62154         | 22       |
| 187.06264                      | 0.0007  | 299660        | 16       | 187.0631                       | 0.0007  | 50008         | 22       |
| 195.05833                      | 0.0017  | 397268        | 9        | 195.0571                       | 0.0017  | 66278         | 12       |
| 199.06449                      | 0.0014  | 641590        | 14       | 199.0639                       | 0.0014  | 107000        | 22       |
| 241.07341                      | 0.0003  | 2130069       | 11       | 241.0733                       | 0.0004  | 355094        | 13       |
| 319.11496                      | 0.0007  | 387097        | 15       | 319.1139                       | 0.0005  | 64625         | 18       |
| 377.12428                      | 0.0002  | 697108        | 17       | 377.1244                       | 0.0002  | 116313        | 22       |

**Fig S5** LC-Orbitrap MS/MS of (A) Hydroxydecarboxymethyl oleuropein aglycone and (B) Hydroxy oleuropein aglycone

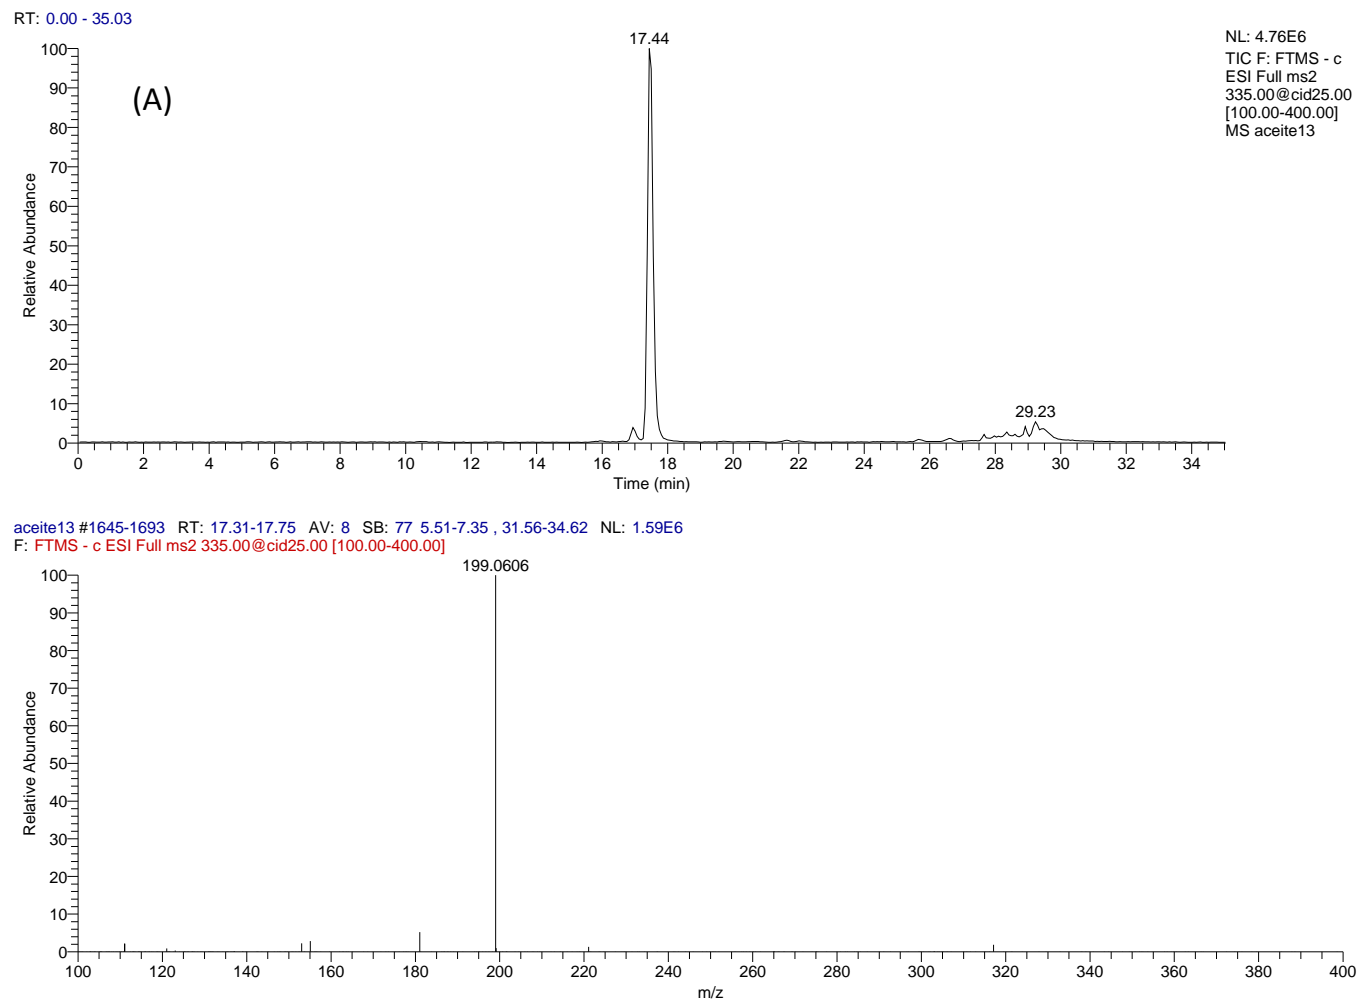

RT: 0.00 - 35.03

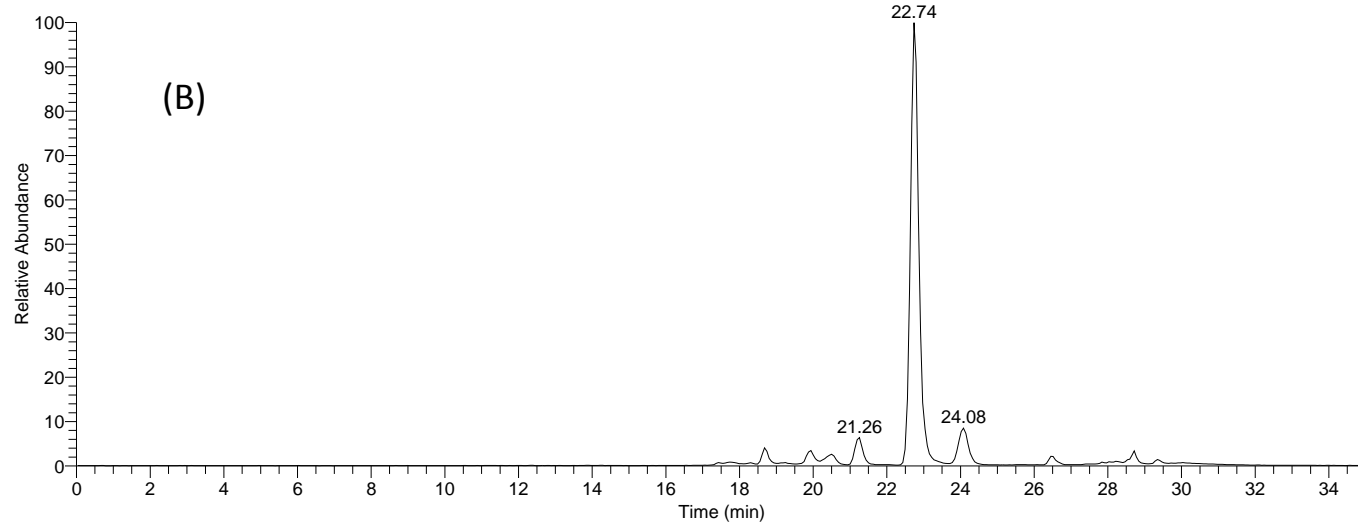

NL: 1.49E7  
TIC F: FTMS - c  
ESI Full ms2  
393.00@cid35.00  
[105.00-450.00]  
MS aceite13

aceite13 #1897-1970 RT: 19.94-20.63 AV: 12 SB: 30  
F: FTMS - c ESI Full ms2 393.00@cid35.00 [105.00-450.00]

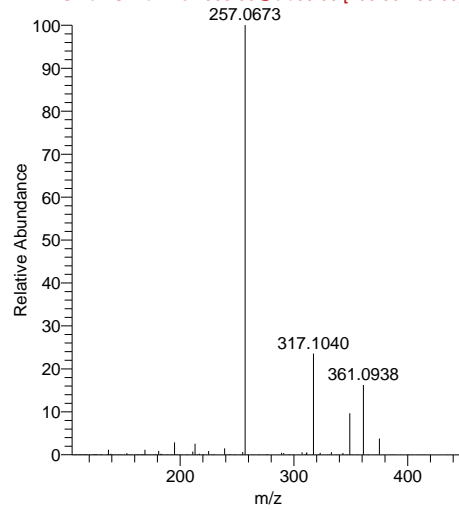

aceite13 #2009-2032 RT: 21.13-21.32 AV: 4 SB: 30  
F: FTMS - c ESI Full ms2 393.00@cid35.00 [105.00-450.00]

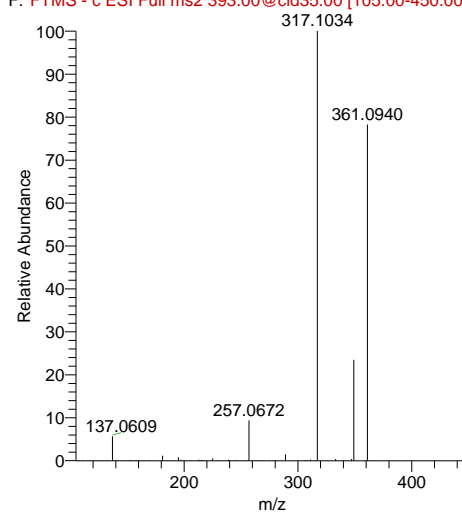

aceite13 #2009-2032 RT: 21.13-21.32 AV: 4 SB: 30  
F: FTMS - c ESI Full ms2 393.00@cid35.00 [105.00-450.00]

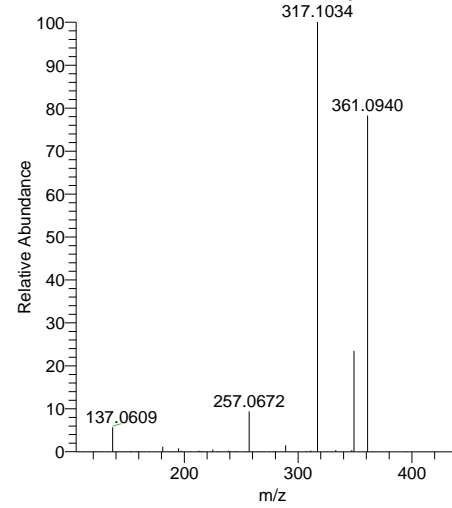

Supplement: c8ay01865k1.pdf [file c8ay01865k1.pdf]
